# Supplementary material for: PKCαand ERβAre Associated with Triple-Negative Breast Cancers in African American and Caucasian Patients
Source: Hindawi journal article supplement (doi:10.1155/2012/740353), 2012-01-01
Supplement: f1 [file 740353.f1.pdf]

**Supplemental Table 1A. Association between PKC $\alpha$  and subtypes**

| Outcome             | Median (Minimum, Maximum) |                     |                |                | <i>P</i> -value <sup>*</sup> |
|---------------------|---------------------------|---------------------|----------------|----------------|------------------------------|
|                     | Luminal A<br>(N=64)       | Luminal B<br>(N=66) | TNBC<br>(N=44) | HER2<br>(N=24) |                              |
| PKC $\alpha$ (freq) | 2.00 (0, 4)               | 2.00 (0, 4)         | 3.00 (0, 4)    | 2.50 (0, 4)    | 0.0004 <sup>+++</sup>        |
| PKC $\alpha$ (int)  | 2.00 (0, 4)               | 1.00 (0, 3)         | 2.00 (0, 4)    | 2.00 (0, 4)    | 0.0013 <sup>++</sup>         |
| PKC $\alpha$ (sum)  | 4.00 (0, 8)               | 3.00 (0, 7)         | 5.00 (0, 8)    | 4.50 (0, 8)    | 0.0002 <sup>+++</sup>        |

\**P*-value is based on the Kruskal-Wallis Test. <sup>†</sup>*P*-value <0.05; <sup>++</sup>*P*-value <0.01; <sup>+++</sup>*P*-value <0.001.

**Supplemental Table 1B. Association between PKC $\alpha$  and subtypes stratified by race**

| Race      | Outcome             | Median (Minimum, Maximum) |             |                |                | <i>P</i> -value <sup>*</sup> |
|-----------|---------------------|---------------------------|-------------|----------------|----------------|------------------------------|
|           |                     | A<br>(N=64)               | B<br>(N=66) | TNBC<br>(N=44) | HER2<br>(N=24) |                              |
| AA        | PKC $\alpha$ (freq) | 2.0 (0, 4)                | 1.5 (0, 4)  | 3.0 (0, 4)     | 2.0 (0, 4)     | 0.0530                       |
|           | PKC $\alpha$ (int)  | 2.0 (0, 4)                | 1.0 (0, 3)  | 2.0 (0, 4)     | 2.0 (0, 3)     | 0.0109 <sup>†</sup>          |
|           | PKC $\alpha$ (sum)  | 4.0 (0, 8)                | 3.0 (0, 7)  | 5.0 (0, 8)     | 4.0 (0, 7)     | 0.0094 <sup>++</sup>         |
| Caucasian | PKC $\alpha$ (freq) | 2.0 (0, 4)                | 2.0 (0, 4)  | 3.0 (0, 4)     | 3.0 (0, 4)     | 0.0093 <sup>++</sup>         |
|           | PKC $\alpha$ (int)  | 1.5 (0, 4)                | 1.0 (0, 3)  | 2.0 (0, 3)     | 2.0 (0, 4)     | 0.1628                       |
|           | PKC $\alpha$ (sum)  | 3.0 (0, 7)                | 3.0 (0, 7)  | 5.0 (0, 7)     | 5.0 (0, 8)     | 0.0276 <sup>†</sup>          |

\**P*-value is based on the Kruskal-Wallis Test. <sup>†</sup>*P*-value <0.05; <sup>++</sup>*P*-value <0.01; <sup>+++</sup>*P*-value <0.001.

**Supplemental Table 2. ER $\beta$  expression stratified by subtype**

| Outcome             | Median (Minimum, Maximum) |                     |                |                  | <i>P</i> -value <sup>*</sup> |
|---------------------|---------------------------|---------------------|----------------|------------------|------------------------------|
|                     | Luminal A<br>(N=58)       | Luminal B<br>(N=59) | TNBC<br>(N=45) | HER2 +<br>(N=31) |                              |
| ER $\beta$ freq (n) | 2.00 (0, 4)               | 2.00 (0, 4)         | 0.00 (0, 4)    | 1.00 (0, 4)      | 0.082                        |
| ER $\beta$ int (n)  | 1.50 (0, 4)               | 2.00 (0, 4)         | 0.00 (0, 4)    | 1.00 (0, 3)      | 0.059                        |
| ER $\beta$ freq (c) | 3.00 (2, 3)               | 3.00 (2, 4)         | 3.00 (1, 3)    | 3.00 (2, 3)      | 0.158                        |
| ER $\beta$ int (c)  | 1.50 (1, 3)               | 1.00 (1, 4)         | 1.00 (1, 3)    | 1.00 (1, 2)      | 0.698                        |

<sup>\*</sup>*P*-value based on the Kruskal-Wallis test. n: nuclear; c: cytoplasmic; TNBC: triple negative breast cancer

#
